# Supplementary material for: All-vacuum deposited perovskite solar cells with glycine modified NiOxhole-transport layers
Source: Royal Society of Chemistry journal article supplement (doi:10.1039/d2ra01360f), 2022-01-01
Supplement: d2ra01360f1.pdf [file d2ra01360f1.pdf]

# All-vacuum deposited perovskite solar cells with glycine modified NiO<sub>x</sub> hole-transport layer

Cheng Fang<sup>a</sup>, Qianqian Zhao<sup>a</sup>, Fuping Zhao<sup>a</sup>, Fuzhi Huang<sup>a,b</sup>, Yong Peng<sup>a</sup>,  
Zhiliang Ku<sup>\*a,b</sup>, Yi-Bing Cheng<sup>b</sup> and Zhengyi Fu<sup>\*a</sup>

<sup>a</sup>State Key Laboratory of Advanced Technologies for Materials Synthesis and Processing, Wuhan University of Technology, 122 Luoshi Road, Wuhan 430070, Hubei Province, China

<sup>b</sup>Foshan Xianhu Laboratory of the Advanced Energy Science and Technology Guangdong Laboratory, Foshan 528216, Guangdong Province, China

\*Corresponding author: Zhiliang Ku, E-mail: [zhiliang.ku@whut.edu.cn](mailto:zhiliang.ku@whut.edu.cn); Zhengyi Fu, E-mail: [zyfu@whut.edu.cn](mailto:zyfu@whut.edu.cn)

**Keywords:** All-vacuum deposition; perovskite solar cell; nickel oxide; glycine

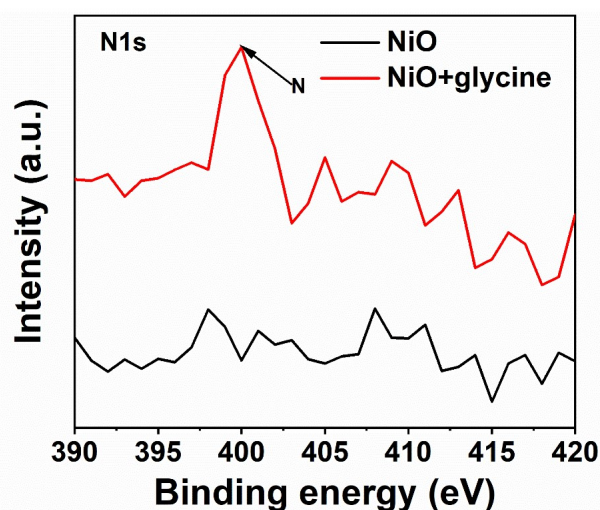

Figure S1. XPS high resolution spectra of the N1s.

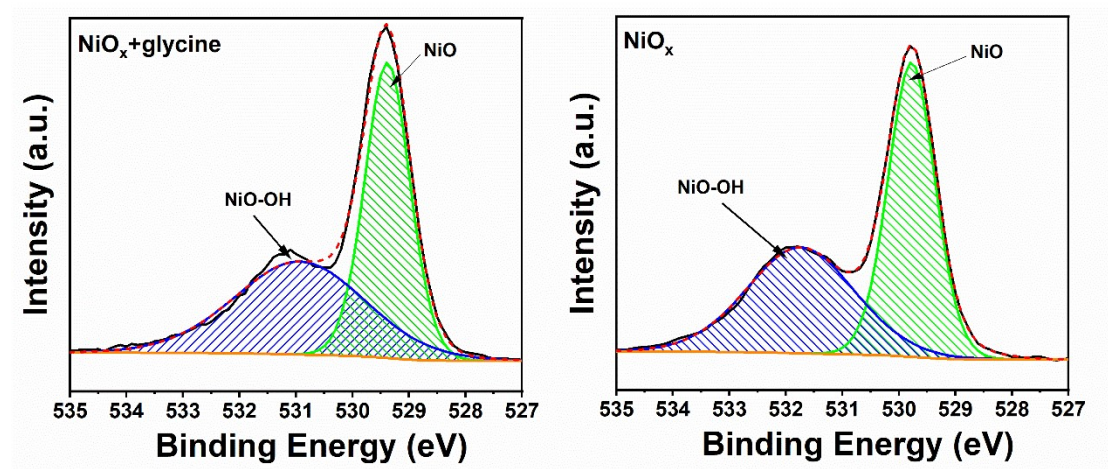

Figure S2. XPS spectra of O1s peak for NiO<sub>x</sub>+glycine and NiO<sub>x</sub> films.

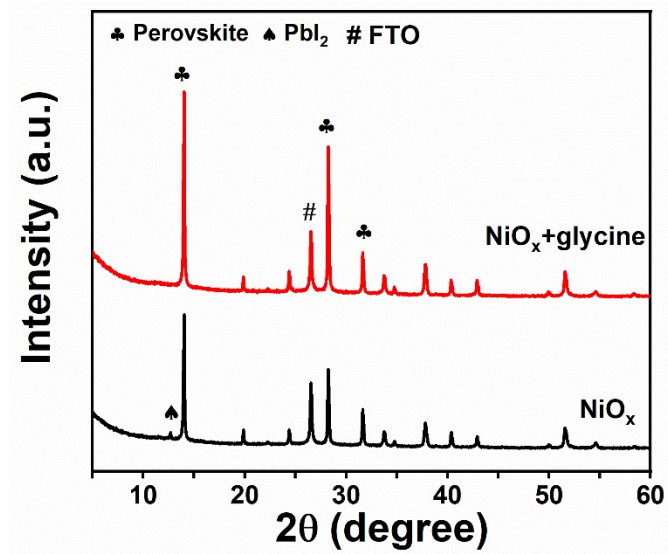

**Figure S3.** XRD patterns of perovskite films grown on NiO<sub>x</sub>+glycine and NiO<sub>x</sub> films.

**Table S1.** Contact angles of the NiO<sub>x</sub> films with different immersion time in glycine solution.

| Immersion time (min) | Contact angle (°) |       |
|----------------------|-------------------|-------|
|                      | left              | right |
| 0                    | 23.75             | 21.33 |
| 30                   | 32.86             | 32.66 |
| 60                   | 47.22             | 47.91 |
| 90                   | 69.70             | 63.93 |
| 120                  | 69.61             | 67.94 |
| 150                  | 67.81             | 65.55 |

**Table S2.** Fitted parameters of the TRPL spectra.

| Substrate                 | A <sub>1</sub> | τ <sub>1</sub> (ns) | A <sub>2</sub> | τ <sub>2</sub> (ns) |
|---------------------------|----------------|---------------------|----------------|---------------------|
| NiO <sub>x</sub>          | 526            | 58                  | 756            | 174                 |
| NiO <sub>x</sub> +glycine | 332            | 37                  | 933            | 214                 |

**Table S3.** PCE of devices based on different preparation methods and modified materials

| HTL                                  |                                                                                                                  |                                                                      |             |      |           |
|--------------------------------------|------------------------------------------------------------------------------------------------------------------|----------------------------------------------------------------------|-------------|------|-----------|
| Deposition Routes                    | Perovskite                                                                                                       | Treatment of materials                                               | PCE%(w/w)   | Year | Ref       |
| sol-gel                              | $\text{CH}_3\text{NH}_3\text{PbI}_{3-x}\text{Cl}_x$                                                              | Ethanolamine molecules (EDA)                                         | 15.70/11.47 | 2016 | [1]       |
| Spin $\text{NiO}_x$ NPs              | $\text{MAPbI}_3$                                                                                                 | para-substituted benzoic acid                                        | 18.4/15.3   | 2017 | [2]       |
| Solution( $\text{Cu}:\text{NiO}_x$ ) | $\text{MAPbI}_3$                                                                                                 | Cysteine (Cys)                                                       | 17.8/14.4   | 2018 | [3]       |
| Solution                             | $\text{MAPbI}_3$                                                                                                 | n-Butylamine                                                         | 18.9/13.2   | 2019 | [4]       |
| Solution                             | CsFAMA mixed                                                                                                     | 2,2'-bipyridine(/2,2'-BiPy)                                          | 15.86/16.53 | 2019 | [5]       |
| Sputter                              | $\text{Cs}_{0.05}(\text{FA}_{0.83}\text{MA}_{0.17})_{0.9}$<br>$_{5}\text{Pb}(\text{I}_{0.82}\text{Br}_{0.18})_3$ | [2-(3,6-dimethoxy-9H-carbazol-9-yl)ethyl]phosphonic acid (MeO-2PACz) | 19.9/17.9   | 2021 | [6]       |
| Spin-coating $\text{NiO}_x$ NPs      | CsFAMA mixed                                                                                                     | 3-(Triethoxysilyl)propylamine (TSPA)                                 | 20.21/18.71 | 2021 | [7]       |
| spin-coating $\text{NiO}_x$ NPs      | $\text{MAPbI}_3$                                                                                                 | trimethylolpropane tris(2-methyl-1-aziridinepropionate) (SaC-100)    | 19.29/17.54 | 2021 | [8]       |
| Sputter                              | $\text{Cs}_{0.05}\text{MA}_{0.15}\text{FA}_{0.80}\text{Pb}(\text{I}_{0.85}\text{Br}_{0.15})_3$                   | organometallic dye molecule (N719)                                   | 19.2/16.7   | 2021 | [9]       |
| Sputter                              | $\text{MAPbI}_3$                                                                                                 | \                                                                    | 15.7        | 2021 | [10]      |
| Sputter                              | $\text{MAPbI}_3$                                                                                                 | \                                                                    | 15.6        | 2021 | [11]      |
| E-beam                               | $\text{MAPbI}_3$                                                                                                 | \                                                                    | 15.4        | 2018 | [12]      |
| E-beam                               | $\text{MAPbI}_3$<br>(Co-evaporation)                                                                             | \                                                                    | 15.6        | 2019 | [13]      |
| E-beam                               | $\text{Cs}_{0.14}\text{FA}_{0.86}\text{Pb}(\text{Br}_x\text{I}_{1-x})_3$<br>(Vapor-solid reaction)               | glycine                                                              | 17.96/15.27 | 2022 | This work |

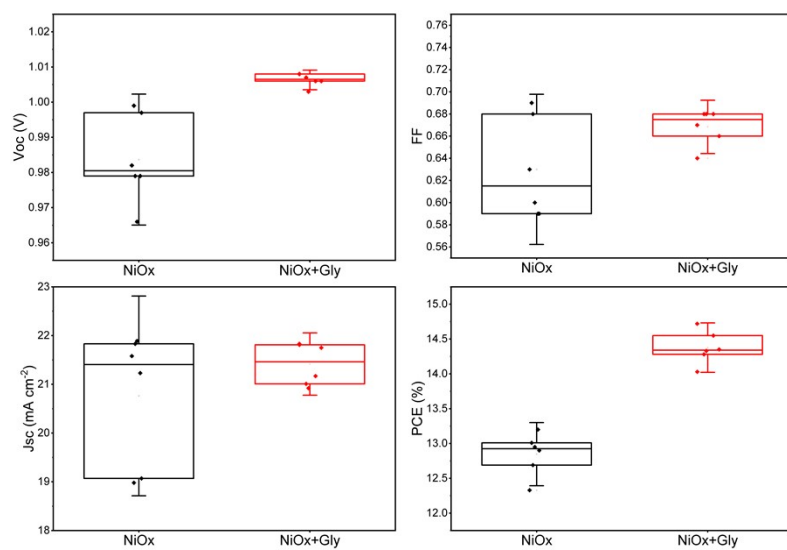

Fig S4. Statistical results of the  $J$ - $V$  parameters of devices based on NiO<sub>x</sub> and NiO<sub>x</sub>+glycine films.

## Reference

- [1] Y. Bai, H. Chen, S. Xiao, Q. Xue, T. Zhang, Z. Zhu, Q. Li, C. Hu, Y. Yang, Z. Hu, F. Huang, K. S. Wong, H.-L. Yip, S. Yang, *Advanced Functional Materials* **2016**, 26, 2950.
- [2] Q. Wang, C. C. Chueh, T. Zhao, J. Cheng, M. Eslamian, W. C. H. Choy, A. K. Jen, *ChemSusChem* **2017**, 10, 3794.
- [3] J. He, Y. Xiang, F. Zhang, J. Lian, R. Hu, P. Zeng, J. Song, J. Qu, *Nano Energy* **2018**, 45, 471.
- [4] Y. Cheng, M. Li, X. Liu, S. H. Cheung, H. T. Chandran, H.-W. Li, X. Xu, Y.-M. Xie, S. K. So, H.-L. Yip, S.-W. Tsang, *Nano Energy* **2019**, 61, 496.
- [5] Y.-W. Zhang, P.-P. Cheng, J.-M. Liang, W.-Y. Tan, Y. Min, *Synthetic Metals* **2019**, 258, 116197.
- [6] J. Sun, C. Shou, J. Sun, X. Wang, Z. Yang, Y. Chen, J. Wu, W. Yang, H. Long, Z. Ying, X. Yang, J. Sheng, B. Yan, J. Ye, *Solar RRL* **2021**, 5, 2100663.
- [7] D. S. Mann, P. Patil, S.-N. Kwon, S.-I. Na, *Applied Surface Science* **2021**, 560, 149973.
- [8] J. Zhang, J. Long, Z. Huang, J. Yang, X. Li, R. Dai, W. Sheng, L. Tan, Y. Chen, *Chemical Engineering Journal* **2021**, 426, 131357.
- [9] S. Zhumagali, F. H. Isikgor, P. Maity, J. Yin, E. Ugur, M. De Bastiani, A. S. Subbiah, A. J. Mirabelli, R. Azmi, G. T. Harrison, J. Troughton, E. Aydin, J. Liu, T. Allen, A. u. Rehman, D. Baran, O. F. Mohammed, S. De Wolf, *Advanced Energy Materials* **2021**, 11, 2101662.
- [10] N. Pant, A. Kulkarni, M. Yanagida, Y. Shirai, S. Yashiro, M. Sumiya, T. Miyasaka, K. Miyano, *ACS Applied Energy Materials* **2021**, 4, 4530.
- [11] H.-J. Seok, J.-H. Park, A. Yi, H. Lee, J. Kang, H. J. Kim, H.-K. Kim, *ACS Applied Energy Materials* **2021**, 4, 5452.
- [12] S. R. Pae, S. Byun, J. Kim, M. Kim, I. Gereige, B. Shin, *ACS Appl Mater Interfaces* **2018**, 10, 534.
- [13] T. Abzieher, S. Moghadamzadeh, F. Schackmar, H. Eggers, F. Sutterlütli, A. Farooq, D. Kojda, K. Habicht, R. Schmager, A. Mertens, R. Azmi, L. Klohr, J. A. Schwenzler, M. Hetterich, U. Lemmer, B. S. Richards, M. Powalla, U. W. Paetzold, *Advanced Energy Materials* **2019**, 9, 1802995.
